# Supplementary material
Source: publisher figshare collection journal article supplement (https://acs.figshare.com/ndownloader/files/5671689)

# 1 Inhibitor compound potential parameters

In the table below, the potential parameters for compound 2 are given. Atom numbers are as specified in Fig. 1, and each atom is specified as a CHARMM22 atom type and an associated charge. Carbon atoms not specified in the figure/table are treated as CA atom types in the CHARMM22 force field with 0 charge.

Table 1: Potential parameters for compound 2.

| Atom number | CHARMM22 atom type | charge |
|-------------|--------------------|--------|
| 1           | CT1                | 0.140  |
| 2           | HA                 | 0.090  |
| 3           | CT2                | 0.000  |
| 4           | CA                 | -0.115 |
| 5           | CA                 | -0.115 |
| 6           | CA                 | -0.115 |
| 7           | CA                 | -0.115 |
| 8           | CA                 | 0.000  |
| 9           | CA                 | -0.115 |
| 10          | HP                 | 0.115  |
| 11          | HP                 | 0.115  |
| 12          | HP                 | 0.115  |
| 13          | HP                 | 0.115  |
| 14          | HP                 | 0.115  |
| 15          | CA                 | -0.115 |
| 16          | CA                 | -0.115 |
| 17          | CA                 | -0.115 |
| 18          | CA                 | -0.115 |
| 19          | CA                 | 0.000  |
| 20          | CA                 | -0.115 |
| 21          | HP                 | 0.115  |
| 22          | HP                 | 0.115  |
| 23          | HP                 | 0.115  |
| 24          | HP                 | 0.115  |
| 25          | HP                 | 0.115  |
| 26          | OH1                | -0.660 |
| 27          | H                  | 0.430  |

## 2 Constructing the water box in the cavity region.

In this section, the technical details of the algorithm for constructing a rectangular box within the protease cavity for calculating the water density are presented.

First, a coordinate system is chosen in which the  $z$ -axis is defined by taking the unit vector along the line connecting the center-of-mass between the two  $C_\alpha$  atoms of Pro 81 and Pro 81' (see Fig. 2) and the center-of-mass of the two  $C_\alpha$  atoms of Gln 7 and Gln 7', and the  $y$ -axis is defined by taking the component of the vector connecting the  $C_\gamma$  atoms of Val 32 and Val 32' perpendicular to the  $z$  direction and generating a unit vector from the result. Finally, the  $x$ -axis is obtained from the cross product of the unit vectors along the  $y$  and  $z$  directions thus defined.

Next, the height of the box is defined as the projection along the  $z$ -axis defined by the line connecting the center-of-mass between the two OD2 atoms of Asp 25 and Asp 25' and the center-of-mass of the two  $C_\beta$  atoms of Ile 50 and Ile 50'. The box width is defined as the projection along the  $y$ -axis defined by the line connecting the  $C_\gamma$  atoms Val 32 and Val 32', respectively. Finally, the box depth is defined as the projection along the  $x$ -axis defined above of the line connecting the  $C_\alpha$  atoms of Pro 81 and Pro 81'.

This definition ensures that the  $z$ -axis is always the  $C_2$  symmetry axis of the enzyme and ensures that the lines used to compute the height and width of the box are always nearly parallel and perpendicular to the  $z$ -axis, respectively, differing from these orientations by only a few degrees on average.

Figure 1: Depiction of compound 2 including atom labels specified in Table 1.

Figure 2: Illustration of the algorithm used to determine the water box dimensions. Residues referred to are indicated in the figure, and the resulting box is shown.

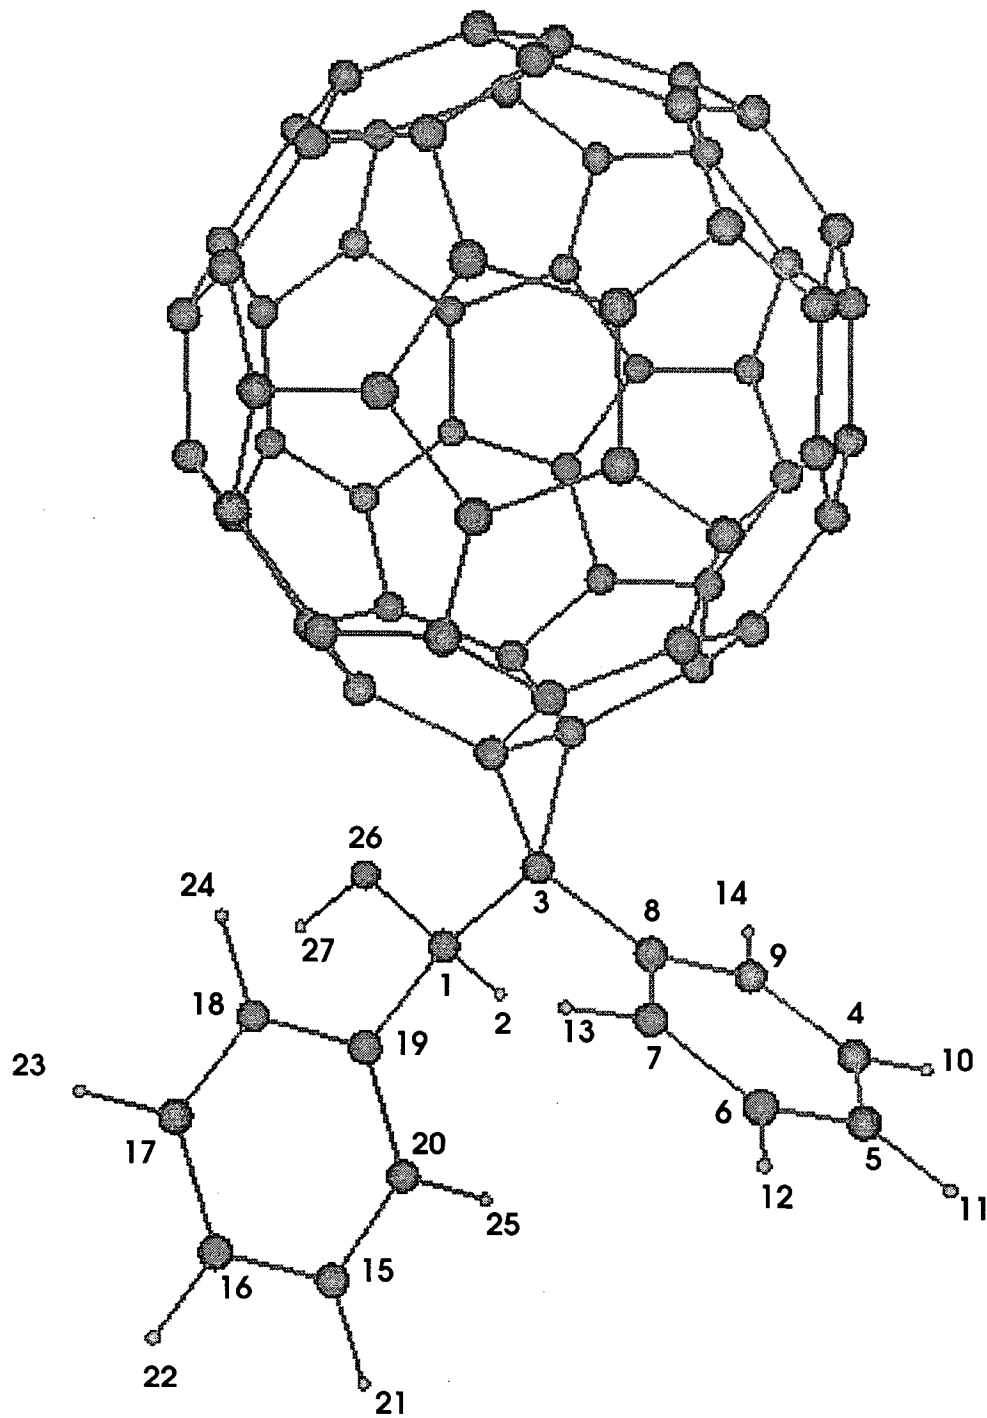

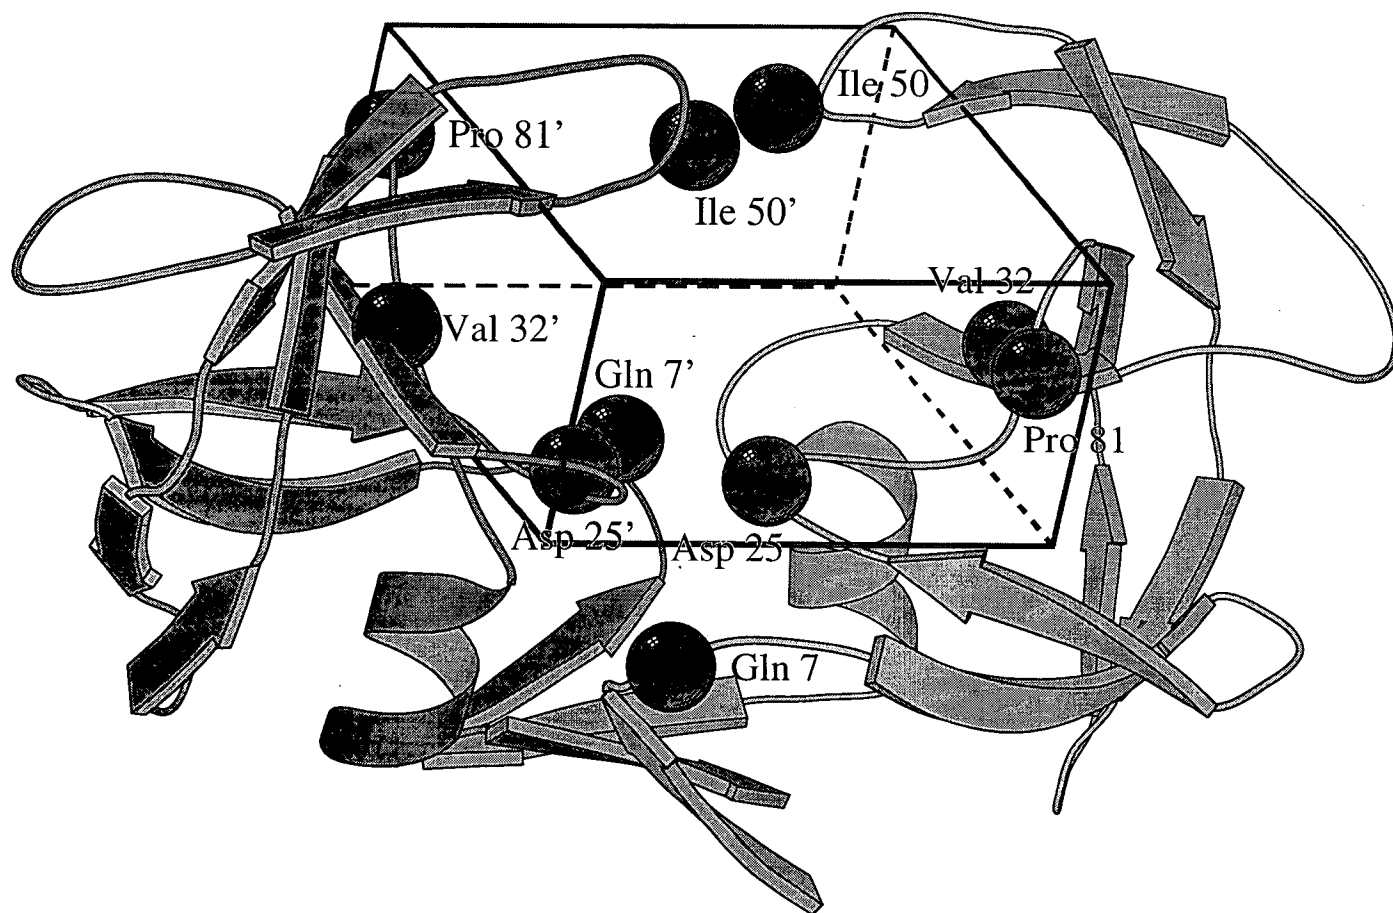

Supplement: Supplementary file 1 [file 5671689]
